# Supplementary material for: Factorial Mendelian randomization: using genetic variants to assess interactions
Source: PubMed Central journal article supplement (PMC7750987; doi:10.1093/ije/dyz161), 2019-08-01
Supplement: dyz161_supplementary_data.pdf [file dyz161_supplementary_data.pdf]

# Supplementary Material

In the Supplementary Material, we provide more detail on the two simulation studies and the applied example presented in the paper.

## Simulation study 1: interactions between risk factors

The two risk factors  $X_1$  and  $X_2$  were generated for  $i = 1, 2, \dots, 10\,000$  participants from the following data-generating model:

$$X_{1i} = \sum_{j=1}^{J_1} \alpha_{1j} G_{1ji} + \sum_{j=1}^{J_c} \alpha_{1cj} G_{cji} + U_{1i} + \epsilon_{1i} \quad \text{and}$$

$$X_{2i} = \sum_{j=1}^{J_2} \alpha_{2j} G_{2ji} + \sum_{j=1}^{J_c} \alpha_{2cj} G_{cji} + U_{2i} + \epsilon_{2i},$$

where  $\mathbf{G}_1$  and  $\mathbf{G}_2$  are the genetic variants associated with  $X_1$  and  $X_2$  respectively, and  $\mathbf{G}_c$  are the set of shared variants that are associated with both  $X_1$  and  $X_2$  (bold font represents vectors). The genotypes (0, 1 or 2) were generated independently from binomial distributions  $\text{Bin}(2, MAF_j)$ , where  $MAF_j$  represents the minor allele frequency (MAF) of the  $j^{\text{th}}$  genetic variant, and was drawn from a uniform distribution  $\text{Unif}(0.1, 0.5)$ .  $\alpha_1$  and  $\alpha_{1c}$  represent the effects of the genetic variants  $\mathbf{G}_1$  and  $\mathbf{G}_c$  on  $X_1$ , and  $\alpha_2$  and  $\alpha_{2c}$  represent the effects of the genetic variants  $\mathbf{G}_2$  and  $\mathbf{G}_c$  on  $X_2$ . The genetic associations were calculated so that  $\mathbf{G}_1$  and  $\mathbf{G}_c$ , and  $\mathbf{G}_2$  and  $\mathbf{G}_c$ , explained  $\sigma_1^2 = \sigma_2^2 = 10\%$  of the variance in  $X_1$  and  $X_2$  respectively. To ensure that each genetic variant explained the same amount of variation in the risk factor, we rearranged:

$$\text{var}(G_{1j}) = \sigma_1^2 = 2 \times \alpha_{1j}^2 MAF_{1j}(1 - MAF_{1j}) \quad \text{and}$$

$$\text{var}(G_{2j}) = \sigma_2^2 = 2 \times \alpha_{2j}^2 MAF_{2j}(1 - MAF_{2j}),$$

to calculate the genetic associations:

$$\alpha_{1j} = \sqrt{\frac{\sigma_1^2 / (J_1 + J_c)}{2 \times MAF_{1j}(1 - MAF_{1j})}},$$

$$\alpha_{1cj} = \sqrt{\frac{\sigma_1^2 / (J_1 + J_c)}{2 \times MAF_{cj}(1 - MAF_{cj})}},$$

$$\alpha_{2j} = \sqrt{\frac{\sigma_2^2 / (J_1 + J_c)}{2 \times MAF_{2j}(1 - MAF_{2j})}},$$

$$\alpha_{2cj} = \sqrt{\frac{\sigma_2^2 / (J_1 + J_c)}{2 \times MAF_{cj}(1 - MAF_{cj})}}.$$

$U_1$  and  $U_2$  represent the set of confounding variables of the  $X_1 - Y$  and  $X_2 - Y$  associations. To ensure the confounders explained 25% of the variation in the risk factors,  $U_1$  and  $U_2$  were drawn independently from a normal distribution  $\mathcal{N}(0, 0.25)$ . To fix the variances of  $X_1$  and  $X_2$  to one, the error terms  $\epsilon_1$  and  $\epsilon_2$  were generated independently from a normal distribution

with mean zero, and variance:

$$\sigma_{\epsilon_1}^2 = 1 - \sigma_1^2 - 0.25 \quad \text{and} \quad \sigma_{\epsilon_2}^2 = 1 - \sigma_2^2 - 0.25.$$

The outcome  $Y$  was generated from:

$$Y_i = \theta_0 + \theta_1 X_{1i} + \theta_2 X_{2i} + \theta_{12} X_{12i} + 0.5U_{1i} + 0.5U_{2i} + \epsilon_{Yi},$$

where  $\theta_1$  and  $\theta_2$  represent the main effects of  $X_1$  and  $X_2$  on  $Y$ , and  $\theta_{12}$  represents the interaction effect of  $X_1$  and  $X_2$  on  $Y$ .  $X_{12}$  was generated by either: a) multiplying  $X_1$  and  $X_2$ ; or b) multiplying the mean centred values of the risk factors ( $X_1 - \bar{X}_1$ ) and ( $X_2 - \bar{X}_2$ ), where  $\bar{X}_1$  and  $\bar{X}_2$  are the mean values of  $X_1$  and  $X_2$ . To ensure the risk factors and confounders explained less than a third of the variance in the outcome, the error term  $\epsilon_Y$  was generated from a standard normal distribution  $\mathcal{N}(0, 1)$ .

Two-stage least squares regression models were fitted to either: a) the directly generated values of the risk factors ( $X_1, X_2, X_{12} = X_1 \times X_2$ ); or b) the mean centred values of the risk factors ( $X_1 - \bar{X}_1, X_2 - \bar{X}_2, X_{12} = (X_1 - \bar{X}_1) \times (X_2 - \bar{X}_2)$ ). When the risk factors were mean centred, the model estimated the marginal effects  $\theta_{1M}$  and  $\theta_{2M}$  of  $X_1$  and  $X_2$  on  $Y$ , otherwise  $\theta_1$  and  $\theta_2$  were estimated. For example, when there were no shared variants  $J_c = 0$ , the marginal effects were approximately:

$$\begin{aligned} \theta_{M1} &= \theta_1 + 0.3\theta_{12} + J_2\theta_{12} \left( \sqrt{\frac{0.1/J_2}{2 \times 0.3 \times 0.7}} \times 0.3 \times 2 \right), \\ \theta_{M2} &= \theta_2 + 0.25\theta_{12} + J_1\theta_{12} \left( \sqrt{\frac{0.1/J_1}{2 \times 0.3 \times 0.7}} \times 0.3 \times 2 \right). \end{aligned} \quad (\text{A1})$$

The genetic variants were either treated as individual IVs or as a single instrument in externally weighted gene scores  $GS_{X_1}$  and  $GS_{X_2}$  for  $X_1$  and  $X_2$ . The external weights for the gene scores were based on an independent set of 10 000 individuals, and were produced from the same data generating model used for the main set of participants. The following four sets of genetic variants were used as IVs in separate two-stage least squares regression models:

- Method 1 – full set of interactions: the  $J_1, J_2$  and  $J_c$  genetic variants used to generate  $X_1$  and  $X_2$ , plus the unique interactions and quadratic terms of  $(\mathbf{G}_1 + \mathbf{G}_c) \times (\mathbf{G}_2 + \mathbf{G}_c)$ .
- Method 2 – reduced set of interactions: the  $J_1, J_2$  and  $J_c$  genetic variants used to generate  $X_1$  and  $X_2$ , plus the interactions from the product  $\mathbf{G}_1 \times \mathbf{G}_2$ .
- Method 3 – continuous gene scores: the two weighted gene scores  $GS_{X_1}$  and  $GS_{X_2}$ , and their product  $GS_{X_1} \times GS_{X_2}$ .
- Method 4 – dichotomized gene scores: the two dichotomized gene scores, and their product.

Method 1 represents the oracle model as it includes all of the variables used in the data generating model, whereas Methods 2 to 4 are misspecified and their performance should be compared to Method 1. In Method 2, we have included a subset of the cross-terms between the genetic variants to create a more realistic scenario where the full set of relevant IVs are not included in the analysis. Method 3 considers the impact of including all of the genetic variants into two separate weighted gene scores, and finally, Method 4 considers the impact of dichotomizing the weighted gene scores.

Data were generated 10 000 times with  $\theta_0 = 0.2$ ,  $\theta_1 = 0.3$ ,  $\theta_2 = 0.2$ , and  $\theta_{12} = 0.1, 0.3$  and 0.5. Each risk factor was associated with  $(J_1 + J_c) = (J_2 + J_c) = 10$  genetic variants, and the number of shared variants  $J_c$  was initially set to 0 to consider the scenario where none of the genetic variants were associated with risk factors (Table 1). The data were re-generated for  $\sigma_1^2 = \sigma_2^2 = 5\%$  and 1%, for  $J_c = 0$  (Supplementary Table A1) and  $J_c = 5$  (Supplementary Table A2), and the analyses were re-performed on the directly generated values of the risk factors. Estimates of the F-statistic and conditional F-statistic for  $X_1$ ,  $X_2$  and  $X_{12}$  were recorded. The analyses were re-performed on the mean centred risk factors (Supplementary Table A3), and the number of shared variants was set to  $J_c = 1, 3, 5, 8$  and 10 (Table 2). The following measurements were recorded for the estimates of  $\theta_1$ ,  $\theta_2$  and  $\theta_{12}$ : median estimate; standard deviation of estimates; median standard error of estimates; empirical power at the 5% significance level; and empirical coverage of the 95% confidence interval. The conditional F-statistic (also known as the Sanderson–Windmeijer F-statistic [1]) represents the strength of the IVs for the risk factors in a joint model, and is the relevant measure of instrument strength for a multivariable Mendelian randomization analysis [2].

|                                                       | F-stat       | CF-stat      | Median | SD     | Median SE | Power | Coverage |
|-------------------------------------------------------|--------------|--------------|--------|--------|-----------|-------|----------|
| Variants explain 10% of the variance in risk factors: |              |              |        |        |           |       |          |
| Methods 1 & 2 <sup>a</sup> – full set of interactions |              |              |        |        |           |       |          |
| $\theta_1 = 0.3$                                      | 10.3 (0.6)   | 2.1 (0.3)    | 0.3043 | 0.0918 | 0.0910    | 91.0  | 95.0     |
| $\theta_2 = 0.2$                                      | 10.3 (0.6)   | 2.1 (0.3)    | 0.2034 | 0.0947 | 0.0945    | 57.9  | 95.5     |
| $\theta_{12} = 0.3$                                   | 8.1 (0.6)    | 1.9 (0.2)    | 0.3080 | 0.0722 | 0.0718    | 98.8  | 95.2     |
| Method 3 – continuous gene scores                     |              |              |        |        |           |       |          |
| $\theta_1 = 0.3$                                      | 364.2 (23.4) | 104.5 (25.6) | 0.2998 | 0.1359 | 0.1332    | 61.9  | 95.6     |
| $\theta_2 = 0.2$                                      | 364.5 (23.2) | 103.9 (25.3) | 0.2019 | 0.1405 | 0.1387    | 31.5  | 95.8     |
| $\theta_{12} = 0.3$                                   | 273.7 (22.4) | 97.8 (22.8)  | 0.3000 | 0.1106 | 0.1091    | 77.5  | 95.8     |
| Method 4 - dichotomized gene scores                   |              |              |        |        |           |       |          |
| $\theta_1 = 0.3$                                      | 224.2 (17.7) | 41.9 (13.4)  | 0.3039 | 0.2145 | 0.2074    | 32.1  | 95.8     |
| $\theta_2 = 0.2$                                      | 224.4 (17.7) | 41.7 (13.3)  | 0.2047 | 0.2236 | 0.2164    | 15.2  | 96.2     |
| $\theta_{12} = 0.3$                                   | 168.2 (16.3) | 40.0 (12.4)  | 0.2972 | 0.1777 | 0.1722    | 41.8  | 96.0     |
| Variants explain 5% of the variance in risk factors:  |              |              |        |        |           |       |          |
| Methods 1 & 2 <sup>a</sup> – full set of interactions |              |              |        |        |           |       |          |
| $\theta_1 = 0.3$                                      | 5.4 (0.4)    | 1.5 (0.2)    | 0.3174 | 0.0931 | 0.0920    | 92.4  | 94.5     |
| $\theta_2 = 0.2$                                      | 5.4 (0.4)    | 1.4 (0.2)    | 0.2166 | 0.0957 | 0.0959    | 62.0  | 94.8     |
| $\theta_{12} = 0.3$                                   | 3.9 (0.4)    | 1.2 (0.2)    | 0.3087 | 0.0889 | 0.0888    | 92.8  | 95.0     |
| Method 3 – continuous gene scores                     |              |              |        |        |           |       |          |
| $\theta_1 = 0.3$                                      | 170.2 (15.5) | 25.4 (11.7)  | 0.2988 | 0.2298 | 0.2121    | 29.9  | 96.9     |
| $\theta_2 = 0.2$                                      | 170.1 (15.7) | 25.2 (11.5)  | 0.1985 | 0.2421 | 0.2237    | 13.8  | 96.9     |
| $\theta_{12} = 0.3$                                   | 109.4 (13.3) | 23.8 (10.4)  | 0.3020 | 0.2458 | 0.2276    | 26.7  | 96.9     |
| Method 4 - dichotomized gene scores                   |              |              |        |        |           |       |          |
| $\theta_1 = 0.3$                                      | 107.3 (12.2) | 10.7 (6.7)   | 0.2970 | 3.928  | 0.3367    | 12.6  | 98.9     |
| $\theta_2 = 0.2$                                      | 106.9 (12.0) | 10.6 (6.6)   | 0.1948 | 3.804  | 0.3551    | 5.4   | 98.7     |
| $\theta_{12} = 0.3$                                   | 68.8 (10.2)  | 10.2 (6.1)   | 0.3033 | 4.065  | 0.3654    | 10.8  | 98.8     |
| Variants explain 1% of the variance in risk factors:  |              |              |        |        |           |       |          |
| Methods 1 & 2 <sup>a</sup> – full set of interactions |              |              |        |        |           |       |          |
| $\theta_1 = 0.3$                                      | 1.8 (0.2)    | 1.4 (0.2)    | 0.3681 | 0.0910 | 0.0901    | 97.7  | 88.4     |
| $\theta_2 = 0.2$                                      | 1.8 (0.2)    | 1.4 (0.2)    | 0.2670 | 0.0930 | 0.0930    | 81.4  | 88.6     |
| $\theta_{12} = 0.3$                                   | 1.4 (0.2)    | 1.0 (0.1)    | 0.3029 | 0.0971 | 0.0972    | 86.4  | 95.4     |
| Method 3 – continuous gene scores                     |              |              |        |        |           |       |          |
| $\theta_1 = 0.3$                                      | 29.5 (6.4)   | 1.9 (2.9)    | 0.2854 | 29.26  | 0.8411    | 2.8   | 99.9     |
| $\theta_2 = 0.2$                                      | 29.4 (6.4)   | 1.9 (2.8)    | 0.1883 | 31.58  | 0.9203    | 1.0   | 99.9     |
| $\theta_{12} = 0.3$                                   | 12.3 (4.1)   | 1.6 (2.1)    | 0.3185 | 52.32  | 1.537     | 0.7   | 100.0    |
| Method 4 - dichotomized gene scores                   |              |              |        |        |           |       |          |
| $\theta_1 = 0.3$                                      | 19.1 (5.1)   | 1.6 (2.8)    | 0.2992 | 123.8  | 1.063     | 1.9   | 99.9     |
| $\theta_2 = 0.2$                                      | 19.0 (5.0)   | 1.5 (2.4)    | 0.1930 | 217.5  | 1.163     | 0.6   | 100.0    |
| $\theta_{12} = 0.3$                                   | 8.1 (3.3)    | 1.2 (1.7)    | 0.3121 | 347.4  | 1.933     | 0.3   | 100.0    |

Supplementary Table A1: Simulation study results for interactions between risk factors varying the amount of variance in the risk factors explained by the genetic variants, with no shared variants and an interaction effect  $\theta_{12} = 0.3$ : mean F-statistic (F-stat), mean conditional F-statistic (CF-stat), median estimate, standard deviation (SD) of estimates, median standard error (SE), empirical power (%) to reject null at 5% significance, and empirical coverage (%) of 95% confidence interval.

<sup>a</sup>As there are no shared variants, methods 1 and 2 are equivalent.

|                                                       | F-stat       | CF-stat      | Median | SD     | Median SE | Power | Coverage |
|-------------------------------------------------------|--------------|--------------|--------|--------|-----------|-------|----------|
| Variants explain 10% of the variance in risk factors: |              |              |        |        |           |       |          |
| Method 1 – full set of interactions                   |              |              |        |        |           |       |          |
| $\theta_1 = 0.3$                                      | 11.6 (0.7)   | 2.5 (0.4)    | 0.2981 | 0.0933 | 0.0927    | 89.1  | 95.0     |
| $\theta_2 = 0.2$                                      | 11.6 (0.7)   | 2.5 (0.4)    | 0.1988 | 0.0955 | 0.0960    | 55.0  | 95.5     |
| $\theta_{12} = 0.3$                                   | 13.4 (0.9)   | 2.2 (0.3)    | 0.3074 | 0.0707 | 0.0706    | 99.0  | 95.0     |
| Method 2 – reduced set of interactions                |              |              |        |        |           |       |          |
| $\theta_1 = 0.3$                                      | 28.8 (1.8)   | 2.6 (0.4)    | 0.2970 | 0.1664 | 0.1649    | 44.2  | 95.8     |
| $\theta_2 = 0.2$                                      | 28.8 (1.8)   | 2.6 (0.4)    | 0.1966 | 0.1719 | 0.1715    | 21.0  | 95.9     |
| $\theta_{12} = 0.3$                                   | 32.6 (2.1)   | 2.3 (0.3)    | 0.3056 | 0.1337 | 0.1333    | 63.4  | 95.8     |
| Method 3 – continuous gene scores                     |              |              |        |        |           |       |          |
| $\theta_1 = 0.3$                                      | 366.4 (23.2) | 131.8 (30.9) | 0.2993 | 0.1272 | 0.1244    | 67.0  | 95.4     |
| $\theta_2 = 0.2$                                      | 366.3 (23.4) | 131.0 (30.7) | 0.1992 | 0.1314 | 0.1293    | 35.1  | 95.4     |
| $\theta_{12} = 0.3$                                   | 426.6 (29.1) | 120.9 (26.9) | 0.3008 | 0.1000 | 0.0978    | 84.8  | 95.4     |
| Method 4 - dichotomized gene scores                   |              |              |        |        |           |       |          |
| $\theta_1 = 0.3$                                      | 233.5 (18.1) | 35.8 (12.4)  | 0.2984 | 0.2399 | 0.2302    | 25.9  | 96.4     |
| $\theta_2 = 0.2$                                      | 233.5 (18.2) | 35.6 (12.3)  | 0.2005 | 0.2482 | 0.2396    | 13.0  | 96.4     |
| $\theta_{12} = 0.3$                                   | 284.1 (21.6) | 33.8 (11.2)  | 0.3006 | 0.1950 | 0.1877    | 36.8  | 96.4     |
| Variants explain 5% of the variance in risk factors:  |              |              |        |        |           |       |          |
| Method 1 – full set of interactions                   |              |              |        |        |           |       |          |
| $\theta_1 = 0.3$                                      | 6.0 (0.5)    | 1.6 (0.2)    | 0.3052 | 0.0980 | 0.0983    | 87.7  | 95.2     |
| $\theta_2 = 0.2$                                      | 6.0 (0.5)    | 1.5 (0.2)    | 0.2078 | 0.1018 | 0.1022    | 53.3  | 95.2     |
| $\theta_{12} = 0.3$                                   | 6.1 (0.5)    | 1.3 (0.2)    | 0.3097 | 0.0925 | 0.0919    | 91.3  | 95.3     |
| Method 2 – reduced set of interactions                |              |              |        |        |           |       |          |
| $\theta_1 = 0.3$                                      | 14.2 (1.2)   | 1.6 (0.3)    | 0.2982 | 0.1600 | 0.1588    | 48.4  | 96.3     |
| $\theta_2 = 0.2$                                      | 14.2 (1.2)   | 1.6 (0.3)    | 0.1994 | 0.1665 | 0.1664    | 22.7  | 96.1     |
| $\theta_{12} = 0.3$                                   | 13.9 (1.3)   | 1.4 (0.2)    | 0.3087 | 0.1621 | 0.1615    | 49.0  | 96.1     |
| Method 3 – continuous gene scores                     |              |              |        |        |           |       |          |
| $\theta_1 = 0.3$                                      | 171.8 (15.6) | 32.9 (14.1)  | 0.3014 | 0.2078 | 0.1951    | 35.7  | 96.4     |
| $\theta_2 = 0.2$                                      | 172.1 (15.4) | 32.6 (13.9)  | 0.2041 | 0.2169 | 0.2043    | 16.9  | 96.5     |
| $\theta_{12} = 0.3$                                   | 171.7 (17.6) | 30.0 (12.0)  | 0.2981 | 0.2147 | 0.2010    | 32.6  | 96.5     |
| Method 4 - dichotomized gene scores                   |              |              |        |        |           |       |          |
| $\theta_1 = 0.3$                                      | 111.9 (12.5) | 9.5 (6.4)    | 0.2933 | 0.8024 | 0.3732    | 10.2  | 99.1     |
| $\theta_2 = 0.2$                                      | 112.2 (12.3) | 9.4 (6.3)    | 0.1981 | 0.8127 | 0.3926    | 4.6   | 98.9     |
| $\theta_{12} = 0.3$                                   | 117.6 (13.5) | 8.9 (5.7)    | 0.3066 | 0.8619 | 0.3967    | 9.6   | 99.1     |
| Variants explain 1% of the variance in risk factors:  |              |              |        |        |           |       |          |
| Method 1 – full set of interactions                   |              |              |        |        |           |       |          |
| $\theta_1 = 0.3$                                      | 2.0 (0.2)    | 1.4 (0.2)    | 0.3504 | 0.0975 | 0.0971    | 94.4  | 92.0     |
| $\theta_2 = 0.2$                                      | 2.0 (0.2)    | 1.3 (0.2)    | 0.2478 | 0.1003 | 0.1002    | 69.6  | 92.2     |
| $\theta_{12} = 0.3$                                   | 1.6 (0.2)    | 1.0 (0.1)    | 0.3037 | 0.1051 | 0.1043    | 82.0  | 95.3     |
| Method 2 – reduced set of interactions                |              |              |        |        |           |       |          |
| $\theta_1 = 0.3$                                      | 3.5 (0.6)    | 1.4 (0.2)    | 0.3225 | 0.1398 | 0.1395    | 63.8  | 95.6     |
| $\theta_2 = 0.2$                                      | 3.5 (0.5)    | 1.4 (0.2)    | 0.2243 | 0.1459 | 0.1457    | 34.3  | 95.7     |
| $\theta_{12} = 0.3$                                   | 2.6 (0.5)    | 1.1 (0.1)    | 0.3036 | 0.1771 | 0.1758    | 41.8  | 96.1     |
| Method 3 – continuous gene scores                     |              |              |        |        |           |       |          |
| $\theta_1 = 0.3$                                      | 31.0 (6.6)   | 2.5 (3.7)    | 0.2912 | 47.33  | 0.7448    | 3.6   | 99.9     |
| $\theta_2 = 0.2$                                      | 30.9 (6.5)   | 2.3 (3.4)    | 0.1939 | 41.15  | 0.8014    | 1.1   | 99.9     |
| $\theta_{12} = 0.3$                                   | 19.9 (5.4)   | 1.9 (2.4)    | 0.3030 | 72.69  | 1.315     | 0.6   | 99.9     |
| Method 4 - dichotomized gene scores                   |              |              |        |        |           |       |          |
| $\theta_1 = 0.3$                                      | 20.9 (5.3)   | 1.6 (2.9)    | 0.2967 | 65.97  | 1.108     | 1.5   | 99.9     |
| $\theta_2 = 0.2$                                      | 20.8 (5.2)   | 1.5 (2.5)    | 0.1959 | 54.84  | 1.208     | 0.4   | 100.0    |
| $\theta_{12} = 0.3$                                   | 14.1 (4.4)   | 1.2 (1.6)    | 0.3096 | 105.7  | 1.991     | 0.2   | 100.0    |

Supplementary Table A2: Simulation study results for interactions between risk factors varying the amount of variance in the risk factors explained by the genetic variants, with 5 shared variants and an interaction effect  $\theta_{12} = 0.3$ : mean F-statistic (F-stat), mean conditional F-statistic (CF-stat), median estimate, standard deviation (SD) of estimates, median standard error (SE), empirical power (%) to reject null at 5% significance, and coverage (%) of 95% confidence interval.

|                                                       | Median | SD     | Median SE | Power (%) | Coverage (%) |
|-------------------------------------------------------|--------|--------|-----------|-----------|--------------|
| Methods 1 & 2 <sup>a</sup> – full set of interactions |        |        |           |           |              |
| $\theta_1 = 0.3$                                      | 0.4311 | 0.0327 | 0.0320    | 100.0     | -            |
| $\theta_2 = 0.2$                                      | 0.3370 | 0.0328 | 0.0320    | 100.0     | -            |
| $\theta_{12} = 0.1$                                   | 0.1101 | 0.0721 | 0.0718    | 33.7      | 94.6         |
| $\theta_1 = 0.3$                                      | 0.6679 | 0.0408 | 0.0320    | 100.0     | -            |
| $\theta_2 = 0.2$                                      | 0.5823 | 0.0413 | 0.0320    | 100.0     | -            |
| $\theta_{12} = 0.3$                                   | 0.3080 | 0.0722 | 0.0718    | 98.8      | 95.2         |
| $\theta_1 = 0.3$                                      | 0.9044 | 0.0527 | 0.0320    | 100.0     | -            |
| $\theta_2 = 0.2$                                      | 0.8290 | 0.0528 | 0.0320    | 100.0     | -            |
| $\theta_{12} = 0.5$                                   | 0.5073 | 0.0715 | 0.0718    | 100.0     | 95.2         |
| Method 3 – continuous gene scores                     |        |        |           |           |              |
| $\theta_1 = 0.3$                                      | 0.4178 | 0.0348 | 0.0343    | 100.0     | -            |
| $\theta_2 = 0.2$                                      | 0.3234 | 0.0349 | 0.0343    | 100.0     | -            |
| $\theta_{12} = 0.1$                                   | 0.1010 | 0.1113 | 0.1091    | 15.4      | 95.5         |
| $\theta_1 = 0.3$                                      | 0.6539 | 0.0424 | 0.0343    | 100.0     | -            |
| $\theta_2 = 0.2$                                      | 0.5691 | 0.0431 | 0.0343    | 100.0     | -            |
| $\theta_{12} = 0.3$                                   | 0.3000 | 0.1106 | 0.1091    | 77.5      | 95.8         |
| $\theta_1 = 0.3$                                      | 0.8906 | 0.0539 | 0.0343    | 100.0     | -            |
| $\theta_2 = 0.2$                                      | 0.8165 | 0.0543 | 0.0343    | 100.0     | -            |
| $\theta_{12} = 0.5$                                   | 0.4995 | 0.1107 | 0.1092    | 98.7      | 95.6         |
| Method 4 – dichotomized gene scores                   |        |        |           |           |              |
| $\theta_1 = 0.3$                                      | 0.4173 | 0.0438 | 0.0435    | 100.0     | -            |
| $\theta_2 = 0.2$                                      | 0.3236 | 0.0438 | 0.0434    | 100.0     | -            |
| $\theta_{12} = 0.1$                                   | 0.1022 | 0.1786 | 0.1720    | 8.0       | 95.9         |
| $\theta_1 = 0.3$                                      | 0.6538 | 0.0496 | 0.0435    | 100.0     | -            |
| $\theta_2 = 0.2$                                      | 0.5687 | 0.0506 | 0.0435    | 100.0     | -            |
| $\theta_{12} = 0.3$                                   | 0.2972 | 0.1777 | 0.1722    | 41.8      | 96.0         |
| $\theta_1 = 0.3$                                      | 0.8913 | 0.0597 | 0.0435    | 100.0     | -            |
| $\theta_2 = 0.2$                                      | 0.8165 | 0.0603 | 0.0435    | 100.0     | -            |
| $\theta_{12} = 0.5$                                   | 0.5002 | 0.1776 | 0.1718    | 80.7      | 96.1         |

Supplementary Table A3: Simulation study results for interactions between risk factors with no shared variants after centering the risk factors: median estimate, standard deviation (SD) of estimates, median standard error (SE), empirical power (%) to reject null at 5% significance, and empirical coverage (%) of 95% confidence interval. Note that centering changes the estimands for the main effect terms, not only the estimates – hence coverage is only displayed for the interaction term.

<sup>a</sup>As there are no shared variants, methods 1 and 2 are equivalent.

## Simulation study 2: interactions between interventions

Using the same notation defined in the first simulation study, the risk factor  $X$  was generated for  $i = 1, 2, \dots, 10\,000$  participants from the following data generating model:

$$X_i = 0.3 + \sum_{j=1}^{J_A} \alpha_{Aj} G_{Aji} + \sum_{j=1}^{J_B} \alpha_{Bj} G_{Bji} + \alpha_{AB} \sum_{j=1}^{J_A \times J_B} G_{ABji} + U_i + \epsilon_{Xi}.$$

We assume that the two gene regions are distinct, and the genetic variants  $\mathbf{G}_A$  and  $\mathbf{G}_B$  are not in linkage disequilibrium. The genotypes were generated independently from binomial distributions  $\text{Bin}(2, \text{MAF}_j)$ , where  $\text{MAF}_j$  represents the MAF for the  $j^{\text{th}}$  genetic variant.  $\text{MAF}_j$  was drawn from a uniform distribution  $\mathcal{U}(\text{MAF}_L, \text{MAF}_U)$ , where the value of  $\text{MAF}_L$  and  $\text{MAF}_U$  were either taken as 0.4 and 0.5 (common variants), or 0.1 and 0.2 (uncommon variants). We assumed that the interaction effect  $\alpha_{AB}$  was constant across the  $J_A \times J_B$  product terms for simplicity.

The approximate proportion of variance explained in  $X$  by  $\mathbf{G}_A$  ( $\sigma_A^2$ ) and  $\mathbf{G}_B$  ( $\sigma_B^2$ ) varied between scenarios. As before, the genetic associations  $\alpha_A$  and  $\alpha_B$  were calculated by rearranging the formula for the variance of the genetic variants to ensure the amount of variance explained by each variant was the same:

$$\alpha_{Aj} = \sqrt{\frac{\sigma_A^2 / J_A}{2 \times \text{MAF}_{Aj}(1 - \text{MAF}_{Aj})}} \quad \text{and}$$

$$\alpha_{Bj} = \sqrt{\frac{\sigma_B^2 / J_B}{2 \times \text{MAF}_{Bj}(1 - \text{MAF}_{Bj})}}.$$

The confounders  $U$  were drawn from  $\mathcal{N}(0, 0.25)$ , and the error term  $\epsilon_X$  was generated from  $\mathcal{N}(0, 0.65)$ . The outcome  $Y$  was generated from:

$$Y_i = \theta_0 + \theta_1 X_i + U_i + \epsilon_{Yi},$$

where  $\theta_1$  represents the causal effect of  $X$  on  $Y$ , and the error term  $\epsilon_Y$  was generated from a standard normal distribution  $\mathcal{N}(0, 1)$ . The data was generated 10 000 times under the following scenarios:

- Scenario 1:  $\text{MAF}_A \sim \mathcal{U}(0.4, 0.5)$ ,  $\text{MAF}_B \sim \mathcal{U}(0.4, 0.5)$ ,  $\sigma_A^2 = 3\%$  and  $\sigma_B^2 = 3\%$
- Scenario 2:  $\text{MAF}_A \sim \mathcal{U}(0.4, 0.5)$ ,  $\text{MAF}_B \sim \mathcal{U}(0.4, 0.5)$ ,  $\sigma_A^2 = 5\%$  and  $\sigma_B^2 = 5\%$
- Scenario 3:  $\text{MAF}_A \sim \mathcal{U}(0.4, 0.5)$ ,  $\text{MAF}_B \sim \mathcal{U}(0.4, 0.5)$ ,  $\sigma_A^2 = 3\%$  and  $\sigma_B^2 = 7\%$
- Scenario 4:  $\text{MAF}_A \sim \mathcal{U}(0.1, 0.2)$ ,  $\text{MAF}_B \sim \mathcal{U}(0.1, 0.2)$ ,  $\sigma_A^2 = 5\%$  and  $\sigma_B^2 = 5\%$
- Scenario 5:  $\text{MAF}_A \sim \mathcal{U}(0.4, 0.5)$ ,  $\text{MAF}_B \sim \mathcal{U}(0.1, 0.2)$ ,  $\sigma_A^2 = 5\%$  and  $\sigma_B^2 = 5\%$
- Scenario 6:  $\text{MAF}_A \sim \mathcal{U}(0.4, 0.5)$ ,  $\text{MAF}_B \sim \mathcal{U}(0.1, 0.2)$ ,  $\sigma_A^2 = 3\%$  and  $\sigma_B^2 = 7\%$

with  $J_A = J_B = 3$ ,  $\theta_0 = 0.2$ ,  $\theta_1 = 0.1$ , and  $\alpha_{AB} = 0.1, 0.3$  and  $0.5$ . The above scenarios were selected to consider the impact of varying the MAF and the amount of variance in the risk factor explained by the genetic variants had on the performance of the method.

For each scenario, optimal weighted gene scores  $GS_A$  and  $GS_B$  were generated for each gene region, where the external weights were produced from an independent set of 10 000

individuals from the same data-generating model used for the main set of participants. The two gene scores were dichotomized at their median values to create two binary variables. The outcome was then regressed against: a) the two continuous gene scores and their product; and b) the dichotomized gene scores and their product. The following measurements were recorded for the estimate of the interaction effect between the gene scores on the outcome: median estimate; standard deviation of estimates; median standard error; and empirical power at the 5% significance level.

## Applied example: the effects of BMI and alcohol on systolic blood pressure

UK Biobank is a prospective, population-based cohort consisting of approximately 500,000 participants aged between 40 and 69 years at baseline living in the UK. Extensive baseline characteristics were collected at recruitment, including lifestyle factors, sociodemographic information, and physical attributes. For the analysis, we considered 367,643 unrelated participants of European descent who passed data quality control measures and had genetic data [3].

Body mass index (BMI,  $\text{kg}/\text{m}^2$ ) and systolic blood pressure (SBP, mmHg) were measured at baseline when participants attended the assessment centre. Information on baseline alcohol consumption was obtained from a touchscreen questionnaire which included questions on alcohol drinking status, frequency of alcohol consumption, and beverage type. The responses to the amount of alcohol drank and beverage type were used to create a continuous variable that represented alcohol consumption in units per day. To adjust for blood pressure medication, 15 mmHg was added to SBP for individuals who reported to be on blood pressure lowering medication [4]. Individuals were dropped from the analysis if they had missing data on BMI, SBP, alcohol consumption, or relevant genetic variants. The final sample size was 291,781.

We used the 77 genome-wide significant variants from a meta-analysis by the Genetic Investigation of ANthropometric Traits (GIANT) consortium in participants of European ancestry to act as IVs for BMI [5]. For alcohol, we identified 10 genetic variants in the *ADH1B* gene region that have been shown to be associated with alcohol consumption [6]. The genetic variants used as IVs for BMI and alcohol consumption were cross-referenced to check for any overlap. BMI was regressed separately against each of the 10 alcohol variants, and alcohol consumption was regressed against each of the 77 BMI variants. All models were adjusted for gender, age, and the first ten genomic principal components.

Internally-weighted gene scores were created for BMI based on the 77 genetic variants ( $GS_{BMI}$ ), and for alcohol consumption based on the 10 genetic variants ( $GS_{AC}$ ), and these gene scores were dichotomized at their median values to create two binary variables. A separate binary variable was generated using the rs1229984 variant only, where participants were either considered to have: a) a low alcohol consumption if they were homozygous or heterozygous for the alcohol-decreasing allele; or b) a high alcohol consumption if they were homozygous for the alcohol-increasing allele (as in the paper by Carter *et al.* [7]). Using these binary variables, the following groups of participants were created:

- Low BMI, low alcohol consumption:  $GS_{BMI} \leq med(GS_{BMI})$  and  $GS_{AC} \leq med(GS_{AC})$  or was homozygous or heterozygous for the alcohol decreasing allele for the rs1229984 variant,
- High BMI, low alcohol consumption:  $GS_{BMI} > med(GS_{BMI})$  and  $GS_{AC} \leq med(GS_{AC})$  or was homozygous or heterozygous for the alcohol decreasing allele for the rs1229984 variant,
- Low BMI, high alcohol consumption:  $GS_{BMI} \leq med(GS_{BMI})$  and  $GS_{AC} > med(GS_{AC})$  or was homozygous for the alcohol increasing allele for the rs1229984 variant, and
- High BMI, high alcohol consumption:  $GS_{BMI} > med(GS_{BMI})$  and  $GS_{AC} > med(GS_{AC})$  or was homozygous for the alcohol increasing allele for the rs1229984 variant.

The above criteria created four groups of participants based on the dichotomized gene scores for BMI and alcohol consumption, and another four groups based on the dichotomized gene

score for BMI and the rs1229984 variant. The numbers of participants, and the mean and standard deviation of BMI, alcohol consumption, and SBP were recorded for each group.

Two-stage least squares regression models of SBP were fitted to BMI, alcohol consumption, and the product of BMI and alcohol consumption. The following sets of IVs were considered:

- Method 1: the 77 variants for BMI and 10 variants for alcohol consumption, plus 770 cross-terms between the two sets of variants.
- Method 2: the continuous gene scores  $GS_{BMI}$  and  $GS_{AC}$ , plus their product  $GS_{BMI} \times GS_{AC}$ .
- Method 3: the dichotomized gene scores of  $GS_{BMI}$  and  $GS_{AC}$ , plus their product.

The models were refitted excluding all of the variants for alcohol consumption apart from the lead rs1229984 variant. All models were adjusted for gender, age, and the first ten genomic principal components. For each model, the estimate and standard error of the interaction term was recorded with its p-value. In total, six two-stage least squares regression models were fitted to the dataset, and all of the models were adjusted for age, gender and the first 10 genomic principal components. The F-statistic and the Sanderson–Windmeijer conditional F-statistic were estimated for each set of IVs with respect to BMI, alcohol consumption, and the product of BMI and alcohol consumption (Supplementary Table A4).

|                          | Method 1 |         | Method 2 |         | Method 3 |         |
|--------------------------|----------|---------|----------|---------|----------|---------|
|                          | F-stat   | CF-stat | F-stat   | CF-stat | F-stat   | CF-stat |
| 10 variants for alcohol: |          |         |          |         |          |         |
| BMI                      | 6.8      | 1.3     | 1662.8   | 21.1    | 1054.1   | 7.0     |
| Alcohol consumption      | 2.4      | 1.1     | 268.0    | 20.9    | 55.6     | 6.9     |
| Product term             | 2.4      | 1.1     | 298.6    | 21.0    | 73.2     | 6.9     |
| rs1229984 for alcohol:   |          |         |          |         |          |         |
| BMI                      | 32.8     | 1.3     | 1654.9   | 17.2    | 1066.8   | 13.5    |
| Alcohol consumption      | 7.7      | 1.2     | 245.1    | 17.1    | 241.6    | 13.4    |
| Product term             | 7.9      | 1.2     | 267.7    | 17.1    | 266.5    | 13.4    |

Supplementary Table A4: F-statistics (F-stat) and conditional F-statistics (CF-stat) for applied example.

## Supplementary References

- [1] Sanderson E, Windmeijer F. A weak instrument F-test in linear IV models with multiple endogenous variables. *Journal of Econometrics*. 2016;190(2):212–221.
- [2] Sanderson E, Davey Smith G, Windmeijer F, Bowden J. An examination of multivariable Mendelian randomization in the single sample and two-sample summary data settings. *International Journal of Epidemiology*. 2018;.
- [3] Astle WJ, Elding H, Jiang T, Allen D, Ruklisa D, Mann AL, et al. The allelic landscape of human blood cell trait variation and links to common complex disease. *Cell*. 2016;167(5):1415–1429.
- [4] Warren HR, Evangelou E, Cabrera CP, Gao H, Ren M, Mifsud B, et al. Genome-wide association analysis identifies novel blood pressure loci and offers biological insights into cardiovascular risk. *Nature Genetics*. 2017;49(3):403–415.
- [5] Locke AE, Kahali B, Berndt SI, Justice AE, Pers TH, Day FR, et al. Genetic studies of body mass index yield new insights for obesity biology. *Nature*. 2015;518(7538):197–206.
- [6] Lewis SJ, Zuccolo L, Smith GD, Macleod J, Rodriguez S, Draper ES, et al. Fetal alcohol exposure and IQ at age 8: evidence from a population-based birth-cohort study. *PLOS One*. 2012;7(11):e49407.
- [7] Carter AR, Borges MC, Benn M, Tybjærg-Hansen A, Davey Smith G, Nordestgaard BG, et al. Combined association of body mass index and alcohol consumption with biomarkers for liver injury and incidence of liver disease: a Mendelian randomization study. *JAMA Network Open*. 2019;2(3):e190305.
